# Supplementary material for: Molecular Characterization of Nine TRAF Genes in Yellow Catfish (Pelteobagrus fulvidraco) and Their Expression Profiling in Response to Edwardsiella ictaluri Infection
Source: MDPI journal article supplement (doi:10.3390/ijms24098363), 2023-05-06

## Supplementary materials

**Supplementary Table S1.** Primers used in this study

| Primer       | Sequence (5'-3')                  | Application          |
|--------------|-----------------------------------|----------------------|
| TRAF1-ORF-F  | ATGGCTTTAGCAGCGCCTGT              | ORF cloning          |
| TRAF1-ORF-R  | TCAAGATGAAGAGTCCACCACACA          | ORF cloning          |
| TRAF2a-ORF-F | ATGTTTCATTATAGCTCATGCTTT          | ORF cloning          |
| TRAF2a-ORF-R | TAAAAGGCCAGTGAGGTCAACAATG         | ORF cloning          |
| TRAF2b-ORF-F | ATGTTTCATTATAGCTCATGCTTTCT        | ORF cloning          |
| TRAF2b-ORF-R | TTAAAGGCCAGTGAGGTCAACA            | ORF cloning          |
| TRAF3-ORF-F  | ATGTCCTTGCCGCACCGT                | ORF cloning          |
| TRAF3-ORF-R  | TCATGGGTGTCAGGCAGGTCTG            | ORF cloning          |
| TRAF4a-ORF-F | ATGCCCCGGCTACGACTATAAG            | ORF cloning          |
| TRAF4a-ORF-R | TCAAGCCATGATCTTTTGTGG             | ORF cloning          |
| TRAF4b-ORF-F | ATGCCTGGTTTAGATTACAAGTTTCT        | ORF cloning          |
| TRAF4b-ORF-R | TTAGTTGATTATTCTCTGCACCACAT        | ORF cloning          |
| TRAF5-ORF-F  | ATGGCAGCTGAGGAGAATGAAT            | ORF cloning          |
| TRAF5-ORF-R  | CTACAAATCCTCCAACCCTGTT            | ORF cloning          |
| TRAF6-ORF-F  | ATGGCATCATGTAGTGACATGC            | ORF cloning          |
| TRAF6-ORF-R  | TCAGAGAGATGGTTCAGGTCCTC           | ORF cloning          |
| TRAF7-ORF-F  | ATGAGCTCCGGTAAATCGCACT            | ORF cloning          |
| TRAF7-ORF-R  | TTAGCAGGTCCACACCTTCACG            | ORF cloning          |
| TRAF1-RT-F   | ATAAACGGAGACGGAGTGGA              | qRT-PCR              |
| TRAF1-RT-R   | GGAACGATACGGACGAGAGGT             | qRT-PCR              |
| TRAF2a-RT-F  | ATGGAGGCTTACAACCGC                | qRT-PCR              |
| TRAF2a-RT-R  | CCTCTTCTTGGAAGTCCG                | qRT-PCR              |
| TRAF2b-RT-F  | GTGGACATCGTTTCTGCGT               | qRT-PCR              |
| TRAF2b-RT-R  | TGCTGACCCTCGTAATCTTTC             | qRT-PCR              |
| TRAF3-RT-F   | AATCATTGTTTCGTTTCCATCCAT          | qRT-PCR              |
| TRAF3-RT-R   | ACTCGTGCTCCCTAATTTCTG             | qRT-PCR              |
| TRAF4a-RT-F  | TGCTGCCTGGCGAATACG                | qRT-PCR              |
| TRAF4a-RT-R  | GGCTGCCACTGGGTTTCTG               | qRT-PCR              |
| TRAF4b-RT-F  | TATGCTGGGATTCGGCTACC              | qRT-PCR              |
| TRAF4b-RT-R  | GCTTTGATGAAGATGGCGTTG             | qRT-PCR              |
| TRAF5-RT-F   | AAACGAAGCAAAGTGAAAGTC             | qRT-PCR              |
| TRAF5-RT-R   | CTCAGCATCCAGAACATTACG             | qRT-PCR              |
| TRAF6-RT-F   | TTCGGGGTCAGTTGTCGT                | qRT-PCR              |
| TRAF6-RT-R   | ATGTTTCGGATGGGGTG                 | qRT-PCR              |
| TRAF7-RT-F   | TGGTGGTGAATAACATCGCTG             | qRT-PCR              |
| TRAF7-RT-R   | GTTTGACGGTGAAAGGGCA               | qRT-PCR              |
| Ex-TRAF1-F   | CCGGAATTCATGGCTTTAGCAGCGCCTGT     | Plasmid construction |
| Ex-TRAF1-R   | CGGGGTACCAGATGAAGAGTCCACCACACACT  | Plasmid construction |
| Ex-TRAF2a-F  | CCGGAATTCATGTTTCATTATAGCTCATGCTTT | Plasmid construction |

| Primer      | Sequence (5'-3')                  | Application          |
|-------------|-----------------------------------|----------------------|
| Ex-TRAF2a-R | CGGGGTACCAAGGCCAGTGAGGTCAACAATG   | Plasmid construction |
| Ex-TRAF2b-F | CCGCTCGAGATGGCACGTCCATCTTTGC      | Plasmid construction |
| Ex-TRAF2b-R | CGGGGTACCAAGTCCTGTGAGATCTACGATCGC | Plasmid construction |
| Ex-TRAF3-F  | CCGCTCGAGATGTCCTTGCCGCACCGT       | Plasmid construction |
| Ex-TRAF3-R  | CGGGGTACCTGGGTCAGGCAGGTCTGAA      | Plasmid construction |
| Ex-TRAF4a-F | CCGGAATTCATGCCCCGGCTACGACTATAAGT  | Plasmid construction |
| Ex-TRAF4a-R | CGGGGTACCAGCCATGATCTTTTGTGGGATC   | Plasmid construction |
| Ex-TRAF4b-F | CCGGAATTCATGCCTGGTTTAGATTACAAGTTT | Plasmid construction |
| Ex-TRAF4b-R | CGGGGTACCGTTGATTATTCTCTGCACCACATC | Plasmid construction |
| Ex-TRAF5-F  | CCGCTCGAGATGGCAGCTGAGGAGAATGAA    | Plasmid construction |
| Ex-TRAF5-R  | CGGGGTACCCAAATCCTCCAACCCTGTTGT    | Plasmid construction |
| Ex-TRAF6-F  | CCGGAATTCATGGCATCATGTAGTGACATGCAC | Plasmid construction |
| Ex-TRAF6-R  | CGGGGTACCGAGAGATGGTTCAGGTTCTCGAGG | Plasmid construction |
| Ex-TRAF7-F  | CCCAAGCTTATGAGCTCCGGTAAATCGCACT   | Plasmid construction |
| Ex-TRAF7-R  | CGGGGTACCGCAGGTCCACACCTTCACG      | Plasmid construction |
| β-actin-F   | TCCCTGTATGCCTCTGGTGGT             | Internal reference   |
| β-actin-R   | AAGCTGTAGCCTCTCTCGGTC             | Internal reference   |

**Supplementary Table S2.** List of vertebrate species and the accession numbers of their TRAF amino acid sequences used in this study

| No. | Species name         | Gene name | Accession no.  |
|-----|----------------------|-----------|----------------|
| 1   | <i>Homo sapiens</i>  | TRAF1     | NP_005649.1    |
|     |                      | TRAF2     | NP_066961.2    |
|     |                      | TRAF3     | NP_003291.2    |
|     |                      | TRAF4     | NP_004286.2    |
|     |                      | TRAF5     | NP_001306136.1 |
|     |                      | TRAF6     | NP_665802.1    |
|     |                      | TRAF7     | NP_115647.2    |
| 2   | <i>Mus musculus</i>  | TRAF1     | NP_033447.2    |
|     |                      | TRAF2     | NP_001277342.1 |
|     |                      | TRAF3     | NP_035762.2    |
|     |                      | TRAF4     | NP_033449.2    |
|     |                      | TRAF5     | NP_035763.2    |
|     |                      | TRAF6     | NP_033450.2    |
|     |                      | TRAF7     | NP_001165584.1 |
| 3   | <i>Bos taurus</i>    | TRAF1     | NP_001179730.1 |
|     |                      | TRAF2     | XP_002691752.2 |
|     |                      | TRAF3     | NP_001192515.1 |
|     |                      | TRAF4     | NP_001094750.1 |
|     |                      | TRAF5     | NP_001098810.1 |
|     |                      | TRAF6     | NP_001029833.1 |
|     |                      | TRAF7     | NP_001019692.1 |
| 4   | <i>Gallus gallus</i> | TRAF1     | XP_024997267.1 |
|     |                      | TRAF2     | XP_015135104.1 |
|     |                      | TRAF3     | XP_040557218.1 |
|     |                      | TRAF4     | XP_015151572.3 |
|     |                      | TRAF5     | NP_001383019.1 |
|     |                      | TRAF6     | XP_004941605.1 |

| No. | Species name                   | Gene name | Accession no.  |
|-----|--------------------------------|-----------|----------------|
| 5   | <i>Xenopus tropicalis</i>      | TRAF7     | NP_001012546.2 |
|     |                                | TRAF1     | XP_031747100.1 |
|     |                                | TRAF2     | XP_031746911.1 |
|     |                                | TRAF3     | XP_031746743.1 |
|     |                                | TRAF4     | NP_001005074.1 |
|     |                                | TRAF5     | XP_004914139.2 |
|     |                                | TRAF6     | NP_001008162.2 |
| 6   | <i>Pelodiscus sinensis</i>     | TRAF7     | NP_001135502.1 |
|     |                                | TRAF1     | XP_025039277.1 |
|     |                                | TRAF2a    | XP_006134818.1 |
|     |                                | TRAF3     | XP_025038847.1 |
|     |                                | TRAF5     | XP_006131156.1 |
|     |                                | TRAF6     | XP_006124531.1 |
|     |                                | TRAF7     | XP_014432120.1 |
| 7   | <i>Danio rerio</i>             | TRAF1     | NP_001121853.1 |
|     |                                | TRAF2a    | XP_005172003.1 |
|     |                                | TRAF2b    | XP_005165557.1 |
|     |                                | TRAF3     | NP_001003513.1 |
|     |                                | TRAF4a    | NP_991325.1    |
|     |                                | TRAF4b    | NP_997982.1    |
|     |                                | TRAF5     | XP_021325328.1 |
| 8   | <i>Ictalurus punctatus</i>     | TRAF6     | NP_001038217.1 |
|     |                                | TRAF7     | NP_001073654.1 |
|     |                                | TRAF1     | XP_017322461.1 |
|     |                                | TRAF2a    | XP_017307574.1 |
|     |                                | TRAF2b    | XP_017315229.1 |
|     |                                | TRAF3     | XP_017332416.1 |
|     |                                | TRAF4a    | XP_017346543.2 |
| 9   | <i>Oncorhynchus mykiss</i>     | TRAF4b    | XP_017348734.1 |
|     |                                | TRAF5     | XP_017333882.1 |
|     |                                | TRAF6     | XP_017313922.1 |
|     |                                | TRAF7     | XP_017312723.1 |
|     |                                | TRAF1     | XP_021461029.1 |
|     |                                | TRAF2a    | XP_021462083.2 |
|     |                                | TRAF2b    | XP_021458047.1 |
| 10  | <i>Cyprinus carpio</i>         | TRAF3     | NP_001118087.1 |
|     |                                | TRAF4     | XP_021438221.1 |
|     |                                | TRAF5     | XP_021413078.1 |
|     |                                | TRAF6     | XP_036837353.1 |
|     |                                | TRAF7     | XP_036829480.1 |
|     |                                | TRAF1     | XP_042585371.1 |
|     |                                | TRAF2a    | XP_042579944.1 |
| 11  | <i>Ctenopharyngodon idella</i> | TRAF2b    | XP_042580991.1 |
|     |                                | TRAF3     | XP_042598390.1 |
|     |                                | TRAF4a    | XP_042595193.1 |
|     |                                | TRAF4b    | XP_018953598.1 |
|     |                                | TRAF5     | XP_018933195.1 |
|     |                                | TRAF6     | XP_042584118.1 |
|     |                                | TRAF7     | XP_042578737.1 |
|     |                                | TRAF1     | ABE99697.1     |
|     |                                | TRAF2b    | ABE99696.1     |
|     |                                | TRAF3     | AVR54984.1     |
|     |                                | TRAF4b    | QDF63034.1     |
|     |                                | TRAF5     | QDF63035.1     |
|     |                                | TRAF6     | AGI51678.1     |
|     |                                | TRAF7     | ULE28382.1     |

| No. | Species name                  | Gene name | Accession no.  |
|-----|-------------------------------|-----------|----------------|
| 12  | <i>Salmo salar</i>            | TRAF1     | XP_045562940.1 |
|     |                               | TRAF2a    | XP_014026490.1 |
|     |                               | TRAF2b    | XP_013990611.1 |
|     |                               | TRAF3     | XP_014048262.1 |
|     |                               | TRAF4a    | NP_001167069.1 |
|     |                               | TRAF5     | XP_014026273.1 |
|     |                               | TRAF6     | XP_045564128.1 |
| 13  | <i>Takifugu rubripes</i>      | TRAF7     | XP_045571926.1 |
|     |                               | TRAF2a    | XP_011617744.1 |
|     |                               | TRAF2b    | XP_029693846.1 |
|     |                               | TRAF3     | XP_011618072.1 |
|     |                               | TRAF4a    | XP_003968588.1 |
|     |                               | TRAF6     | XP_029702628.1 |
|     |                               | TRAF7     | XP_003964369.1 |
| 14  | <i>Sparus aurata</i>          | TRAF2a    | XP_030273274.1 |
|     |                               | TRAF2b    | XP_030292638.1 |
|     |                               | TRAF3     | XP_030299697.1 |
|     |                               | TRAF4a    | XP_030259023.1 |
|     |                               | TRAF6     | XP_030270209.1 |
|     |                               | TRAF7     | XP_030263764.1 |
| 15  | <i>Oreochromis niloticus</i>  | TRAF2a    | XP_025752911.1 |
|     |                               | TRAF2b    | XP_013123763.1 |
|     |                               | TRAF3     | XP_025756743.1 |
|     |                               | TRAF4a    | XP_003440320.1 |
|     |                               | TRAF5     | XP_003452807.3 |
|     |                               | TRAF6     | XP_005455785.1 |
|     |                               | TRAF7     | XP_003446520.1 |
| 16  | <i>Paralichthys olivaceus</i> | TRAF2a    | XP_019949664.1 |
|     |                               | TRAF2b    | XP_019937631.1 |
|     |                               | TRAF3     | XP_019962478.1 |
|     |                               | TRAF4a    | XP_019944060.1 |
|     |                               | TRAF6     | XP_019955057.1 |
|     |                               | TRAF7     | XP_019967403.1 |
| 17  | <i>oryzias latipes</i>        | TRAF2a    | XP_011477930.1 |
|     |                               | TRAF2b    | XP_004074805.1 |
|     |                               | TRAF3     | XP_004084442.1 |
|     |                               | TRAF4a    | XP_004075368.1 |
|     |                               | TRAF5     | XP_004065654.2 |
|     |                               | TRAF6     | XP_020567582.1 |
|     |                               | TRAF7     | XP_004071899.1 |
| 18  | <i>Larimichthys crocea</i>    | TRAF2a    | XP_019119930.1 |
|     |                               | TRAF2b    | XP_010736878.2 |
|     |                               | TRAF3     | XP_027130745.1 |
|     |                               | TRAF4a    | XP_010747668.1 |
|     |                               | TRAF5     | XP_019128363.1 |
|     |                               | TRAF6     | XP_019128980.2 |
|     |                               | TRAF7     | XP_010741701.1 |



**Supplementary Table S3.** List of vertebrate species and the accession numbers of their TRAF nucleotide sequences used in this study

| No. | Species name               | Gene name | Accession no.  |
|-----|----------------------------|-----------|----------------|
| 1   | <i>Homo sapiens</i>        | TRAF1     | NM_005658.5    |
|     |                            | TRAF2     | NM_021138.4    |
|     |                            | TRAF3     | NM_003300.4    |
|     |                            | TRAF4     | NM_004295.4    |
|     |                            | TRAF5     | NM_001319207.2 |
|     |                            | TRAF6     | NM_145803.3    |
|     |                            | TRAF7     | NM_032271.3    |
| 2   | <i>Gallus gallus</i>       | TRAF1     | XM_025141499.2 |
|     |                            | TRAF2     | XM_015279618.3 |
|     |                            | TRAF3     | XM_040701284.2 |
|     |                            | TRAF4     | XM_015296086.4 |
|     |                            | TRAF5     | NM_001396090.1 |
|     |                            | TRAF6     | XM_004941548.5 |
|     |                            | TRAF7     | NM_001012528.3 |
| 3   | <i>Xenopus tropicalis</i>  | TRAF1     | XM_031891240.1 |
|     |                            | TRAF2     | XM_031891051.1 |
|     |                            | TRAF3     | XM_031890883.1 |
|     |                            | TRAF4     | NM_001005074.1 |
|     |                            | TRAF5     | XM_004914082.4 |
|     |                            | TRAF6     | NM_001008161.2 |
|     |                            | TRAF7     | NM_001142030.1 |
| 4   | <i>Danio rerio</i>         | TRAF1     | NM_001128381.1 |
|     |                            | TRAF2a    | XM_005171946.4 |
|     |                            | TRAF2b    | XM_005165500.4 |
|     |                            | TRAF3     | NM_001003513.1 |
|     |                            | TRAF4a    | NM_205762.1    |
|     |                            | TRAF4b    | NM_212817.1    |
|     |                            | TRAF5     | XM_021469653.1 |
|     |                            | TRAF6     | NM_001044752.1 |
|     |                            | TRAF7     | NM_001080185.1 |
| 5   | <i>Ictalurus punctatus</i> | TRAF1     | XM_017466972.3 |
|     |                            | TRAF2a    | XM_017452085.3 |
|     |                            | TRAF2b    | XM_017459740.3 |
|     |                            | TRAF3     | XM_017476927.3 |
|     |                            | TRAF4a    | XM_017491054.3 |
|     |                            | TRAF4b    | XM_017493245.3 |
|     |                            | TRAF5     | XM_017478393.3 |
|     |                            | TRAF6     | XM_017458433.3 |
|     |                            | TRAF7     | XM_017457234.3 |
| 7   | <i>Oncorhynchus mykiss</i> | TRAF1     | XM_021605354.2 |
|     |                            | TRAF2a    | XM_021606408.2 |
|     |                            | TRAF2b    | XM_021602372.2 |
|     |                            | TRAF3     | NM_001124615.1 |
|     |                            | TRAF5     | XM_021557403.2 |
|     |                            | TRAF6     | XM_036981458.1 |
|     |                            | TRAF7     | XM_036973585.1 |

**Supplementary Figure S1. Nucleotide and deduced amino acid sequences of open reading frames of *Pf*\_TRAFs.** (A) *Pf*\_TRAF1, (B) *Pf*\_TRAF2a, (C) *Pf*\_TRAF2b, (D) *Pf*\_TRAF3, (E) *Pf*\_TRAF4a, (F) *Pf*\_TRAF4b, (G) *Pf*\_TRAF5, (H) *Pf*\_TRAF6, and (I) *Pf*\_TRAF7. The start and stop codons are marked in bold. The N-glycosylation sites are marked in black circles. The RING finger domain is indicated by the black box, the zf-TRAF domain by the middle bracket, the TRAF-BIRC3-bd domain by the double arrow, the coiled-coil domain by the underline, and the WD40 domain by the curly bracket. The letters e, c, t, and h denote extended strand, random coil,  $\beta$ -turn, and  $\alpha$ -helix, respectively.

A

1 ATGGCTTTAGCAGCGCTGTGCCAGCTCCCCGGGAGAGAACGAATACCCGTCCGGTTTCCCGCAGAGCATCTGTGATGAAGTTCCGGCG  
1 M A L A A P V P S S P G E N E Y P S G F P Q S I C D E V P A  
c c c c c c c c c c c c c c c c c c c c c t t c c c c e e c c c c c  
91 CAGAAATACTTGTGTACCCACTGTGACTGTGTGCTCAACGGAGCGCACCGGAGCAGTGGGACACCGCTACTGCTCGCGTGGCTTAC  
31 Q K Y L C T H C D C V L N G A H R S T C G H R Y C L A C V H  
h h h h h h h h h h h h h h h c c c c c c c c c c c c h h h h h  
181 TGGCTCATCAGAAACAACAAAAATCTTGTGTGCACAAAGTGTAAAGAAGACCCAAACCAGCAAGGCAAGTACGGCTTACTGACTCTTGAC  
61 W L I R N N K N L V C T K C K E D P N Q Q G K Y G L L T L D  
h h e c c c c c c c c c c c c c c c c c c c c c c c h h h h h h h  
271 CAGTTCCTCAACGACGAGCAATCAATAAAGAGATCCTGGCTCTGAAAGTGCACTGCACCAACACTAGCTGTACGTGGAAGAGCACCTTG  
91 Q F F N D A A I N K E I L A L K V H C T N T S C T W K S T L  
h c c c h h h h h h h h h h h h h h e e e c c c c t t c c h h h h  
361 GAGGACTTTGAGGAGTATCAGTGTCTTGTGAATACGCTTTAATCCCTGCAACGTTGGCTGTGGGTTGATGTTTGGAGGAGCGTTG  
121 E D F E E Y Q C H C B Y A L I P C N V G C G L M V L R K T L  
h h h h h c c c c c c c e e e e c c c c c c c h h h h h h h h  
451 GCTGCTCACCTGGACAAGGGCTGTCCCAATAATAAAGCTGTGTCTACATGTTCTGCCACTGACCCCTTCAGAACTCCAGAAACAT  
151 A A H L D K G C P N N K S L C P T C S C P L T P S E L Q K H  
h h h h h h c c c c c c c c c c c c c c c e e e h h h h c c c  
541 GTGTGTCGCAACGACAAGTCTCTCAAAAGCAGAGAAACGACAGAGGATAATAAGCAAGCAAAATTCAGAAAGGAGTCAATGTCAG  
181 V C P N D K K S S K A E K R Q K D N K Q A N S R R K E S C Q  
c c c c c c c c c c h h h h h h h h h c c c c c c c c c c c  
631 TTCTCTGACATTGGATGCCATTAAAGGGAAGCTAGAGAAATTGCGAGACCATGAAAGCTGCAGTTCCGCGGCCACCTTCAGCTCCTC  
211 F S D I G C P F K G T V E K L R D H E S C S S A A H L Q L L  
e e e e c c c c c c c c h h h h h h h h h h h h h h h h h  
721 CTGGAGGTCTTCAGAAGTGTTCGGGTCTCTGTTCCTTCCCGCCTGAGAGGAGCGTGCACTTCCAGGCGCTGGACCTGCTCCTCCATGGC  
241 L E V F R S V R V S V P S P P E R S V H F P G L D L L L H H  
h h h h h h h h h h h h h h h h h h h c c c c h h h h h h h  
811 CAGAGCTCACCTTCTGTTTGCACTCAATCGGCTGGTAGAGGACCGGATGGAGGAGTAAACGACATGGCACTCAGCCTT  
271 Q S S P S V C T Q S A G E V E A D G M D G G V N D M A L S L  
h h h h h h h h h h h h h h h h h h h c c c c c h h h h h h  
901 CATGACGACCAAGCTGAGCTGGAAGTGGGCCAGCAGCTTCACGCCCTTCAGCAGAGGCTACAGATCAGGAGCAAGCTCATCTCGTACTC  
301 H D D Q A E L E V G Q Q L H A L Q Q R L Q I M E N V I S V L  
h h h h h h h h h h h h h h h h h h h h h h h h h h h h h  
991 AGTCACGAGTGGAGAAACCCAGCTCACCGTGACAGCTCTGGACAGAGACCAACCAACATGACAGCTGGTGGAGCACTTAGACAGC  
331 S H E V E K T Q L T V T A L D R D T N T N M Q L V E H L D S  
h h h h h h h h h h h h h h h h h h h c c c h h h h h h h h  
1081 GTGGTTGCAGATCAGCAGCAGAGGATGATCAGGAAAGACCTGCACATCGCCTGCTGCAGCAGAGCATCAGTGGCAGCAGGACGTGTC  
361 V V A D Q Q Q R M I R K D L H I A S L Q Q S I S A Q Q D V S  
h h h h h h h h h h h h h h h h h h h h h h h h h h h h c  
1171 TACGACGGCAGCTTCTCTGGAAGATCTGTAATGTCAGTCAGAAGTTAAGAGAGGACGACAGGGCAAAAGAGCAACCACTATTCGCCA  
391 Y D G T F L W K I C N V S Q K L R E A A T G Q K S N Q Y S P  
c t t e e e e e h h h h h h h h h h h h h h t t c c c e e c c c  
1261 GCCTTCTATACATCCAGATATGGATTAAAGTGTGCATGCGGTGTACATAAACGGAGAGGAGTGGGAAAAGGACGACATGTCTCTT  
421 A F Y T S R Y G F K V C M R L Y I N G D G V G K G T H M S L  
c e e c c c c t t c e e e e e e e e e t t c c c c c c c c e e e  
1351 TTCTTTGTGATTATGAGAGGAGAGTATGACCGCTTCTCTGTTGGCCTTTTAAACACAAGGTGACTTTCTTCTCATGACCAAGAACAA  
451 F F V I M R G E Y D P L L S W P F K H K V T F F L I D Q N Q  
e e e e e t c c t h h e e c c c c c c c c c e e e e e e c t t c  
1441 AGAGAGCATGTACTCGACAGTTCCGTCCCGACCTCTCGTCCGTATCGTTCCAGCGGCCGTGCTGACATGAACGTGGCCAGCGGCTGC  
481 R E H V L D T F R P D L S S V S F Q R P V S D M N V A S G C  
c c h e e e h c c c c c c c c c c c c c c c c c c c c c c c  
1531 CCTCTCTCTGCGCTGCGCAAGCTGCGCTCCCTGAAGCATGCGTACTGCAAGACGACACACTTTTATCAAGTGTGGTGGACTCT  
511 P L F C P L A K L R S L K H A Y C K D D T L F I K C V V D S  
c e e e e e c c c c c c c c c c c c c c c t t c e e e e e e c t  
1621 TCATCTTGA  
541 S S \*  
t c



## B

1 **ATG**TTTCATTATAGCTCATGCTTTCTTTTCATCCCAATGCACTGAGCTCGGTTTCATTTCCCGGCTCAGGTCACATGCTCGCTCGGAATA  
 1 M F H Y S S C F L S S Q C T E L G F I S R L R S H A R S G I  
 e e c c c h e e e c c c c h h h h h h h h h h h h h  
 91 ATAATGGCTGCACAGGAACCGTCCCTCGCTTCTACTGGAAGGCAACAAGCCGGCTTCCGAGGAAAAATCCTTGCCAACAAGCTGGAA  
 31 I M A A Q E P S P S S L E G N K P G F P R K I L A N K L E  
 e e e c c c c c c c c c c c c c c c t t c c c h h h h c c c c  
 181 GAAAAGCATCTGTGTAACATCTGTCAGAAAACTACGAGGCGCTTTTCAGGCGCAGTGCAGGACACCGATTCTGTTCTACTGCTTTAAC  
 61 E K H L **C N I C Q K I L R R P F Q A Q C G H R F C S Y C F** **(N)**  
 h h h h h h h h h h h h h c c c c c c c c c c c c c c c h h h h h  
 271 AAAACAGTGAGTTCTGGTCCCAAAAATGCAGTGTGTTATATAAGAAGATATATTGAGGAGCCAACATCGATTCTGAAACAGGGCTGT  
 91 **K T V S S G P Q K C S A C** I K E D I F E E P T S I L K Q G C  
 h e e c c c c c c c c c c c c c c c c c c c c c c c c c h h h h h h h h c  
 361 GCITTTCTGACAACGCTGTAAGAGAGAAGTCGAAGCCTCGAAGCAGTTGTATCAACGAAGGCTGCAGCTGGACAGGAACCATCAAG  
 121 A F P D N A A K R E V E A L E A V C I N E G C S W T G T I K  
 c c c h h h h h h h h h h h h h e e e c c c c t t c c c h e e h h  
 451 GAATATGAGGCTACCCAGAGGGACAGTGCAGATTTATGATCATCCCATGTCCTGCTCGAAAGAGCTCCTGAGAGCCAACGAACATTGAA  
 151 E Y E A T **[H E G Q C D F M I I P C P S C K E L L R A N E L E]**  
 h h h h h h h c c c c c e e e c c c c c c c c c c c c c h h h h h h h h  
 541 CGTCACAACGAGCGGAATGCCAGAGAGGACTCTGAAGTCAAATACTGCAAAGAACCTTTTCATTTTAAAAACATTAAAGCCACGAT  
 181 R H N E R E C P E R T L N C K Y C K E P F H F K N I K A H **[D]**  
 h h h h h h h c c c c c c c c c c c c c c c c c c c c c h h h h h h h h  
 631 GAGATTTGCCAAAATACCCAATGATTGTGAAGGCTGTGCGAAGAAGAAAATCCCAGAGAAAAGTACGTGGATCACATTAAAGCTGTGT  
 211 E I C P K Y P M I C E G C A K K K I P R E K Y V D H I K L C  
 h c c c c c c c c c c c c c c c c c c c c c c h h h c c h h c c c c  
 721 ACCAAAATCCGACCCCATGCAAGTTCAGTTCGCTGCGACATGTCGTGGAGAAGGAGAAGATCCATGAGCAGGCGGGCATGC  
 241 T K F R T P C R F H V V G C D M S V E K E K I H E H **[E]** E R A C  
 c c c c c c c c c c c c c c c c c c c c c c c h h h h h h h h h h h h  
 811 TCGTACGAGCAGCTGAATCTGCTGCTGCACTTTATCATGGGCAAGGTAGCGTAGAGAGCCTGCAGCCGAGGGCCTGGAACCTGGCC  
 271 S Y E H L N L L L H F I M G I K V S V E S L Q P Q G L E L A  
 h h h h h h h h h h h h h h h h h h h h h h h h h h h h h h h h h h  
 901 AGCCACAAGCTCAAGGAGCTGCAGCAGTCTCTGTGCGAGCTGAAGTCAAGCTGGGTGAGCTGAGCGCTGGGGCTCCCGTGCAGGGGCC  
 301 S H K L K E L Q Q S L C E L E V K L G Q L S A G A P V Q G P  
 h h h h h h h h h h h h h h h h h h h h h h h h h h h h h h h h h h  
 991 TGTGTGCGGTGCGCGCTGCGCTAATCCTCCACCCCTGCGCCACCCGACCCACCCCTGACCACCTCGTTACCCCATTTGCCAGCGCT  
 331 C V P C A P A P N P P P P A P P A P T L T T S F T P L P S A  
 c c c c c c c c c c c c c c c c c c c c c c c h h c c c c c c c c c h h  
 1081 GTCGGCGCGCCCTCGAGCTGCAACTGCACAGCGAGAAGACCAAGTGGCCGAGCTGAGCCGTGCTGCGCAGGCTGCGAGCTGAAGGCC  
 361 V G A A L E L Q L H S E K T K V A **E L S R R C Q A**  
 h h h h h h h h h h h h h h h h h h h h h h h h h h h h h h h h h h  
 1171 AGCACCTTGAGAACATTGTGTGCTGCTGAATGCGAGATGGAGCGCTCAGCCACCACCATGAGGCTTACAACCGCCAGCAGCGGCTC  
 391 **S T F E N I V C V L N R E M E R S A T T M E A Y N R Q H R L**  
 h h h h h h h h h h h h h h h h h h h h h h h h h h h h h h h h h h  
 1261 GACCAGGACAAGATCGAGATCCTCAACAACAGGTACGTCAGCTGGAGAGGACGGTGGGGCTGAGGGATCTTTCCATCGTGAGATGGAG  
 421 **D Q D K I E I L N N K V R Q L E R T V G L** R D L S I V E M E  
 c h h h h h h h h h h h h h h h h h h h h h h h h h h h h h h h h h h  
 1351 AGCAAGATGAGAGAAATGTCAGCCGCCACTACGATGGCGTGTGTTGTGGAGGATCAGGACTTTGCCAAGAAGAGGCAAGACGCTGA  
 451 S K M R E M S A A T Y D G **V F V W R I T D F A K K R Q D A V**  
 h h h h h h h h h h h c c t t e e e e e h h h h h h h h h h h h h h h h  
 1441 GCTGGAAGGGCCCCAGCCATGTTCTACCTGCATTTTATACAAGCAAGTATGGCTACAAGATGTGTTGCGCATCTACCTGAATGGGGAT  
 481 A G R A P A M F S P A F Y T S K Y G Y K M C L R I Y L N G D  
 t t c c c c e e c c c c c c c c c c c c c c c c e e e e e e e e t t t t  
 1531 GGAACAGGGCGCGCACTCACTTGTCTGTTCTGTTGTTGATGAGGGGACACAGTATGCTCAAGTGGCTTTTAAACAGAAG  
 511 **G T G R G T H L S L F T G V V M R G H S D A L L K W P F N Q K**  
 c c c c c c c h e e e e e e e e c c c c t h h h e c c c c c c t t t  
 1621 GTCACCTGATGCTGCTGACCAAGATAACAGAGACATATTGACGCCCTCCGGCCGACATCTCGTCTCGTCTCCAGAGACCC  
 541 V T L M L L D Q N N R E H I I D A F R P D I S S S S F Q R P  
 e e e e e e c t t c c c h e e e e e c c c c c c c c c c c c c c  
 1711 GTCAGCGACATGAACATGCGCAGCGGATGCCCTCTCTGTCGCCCTCCCTAAGCTGACTCCAAGAAGTACATACCTCGTGATGACACC  
 571 V S D M N I A S G C P L F C P L P K L D S K N S Y I R D D T  
 c c c c c c c c c c c c c e e e e h h h h c c c c e e e c t t c  
 1801 ATCTTCATCAAGGCCATTGTTGACCTCACTGGCCCT**TAA**  
 601 I F I K A I V D L T G L \*  
 e e e e e e e c c t t c



C

1 ATGCGACGTCCATCTTTGCCCTTCTTCGATGGACTCAACGTTACCAGGTATATCCCGGCAGGTCCTGTCCGTGCCATGGAACCTAAATAT  
1 M A R P S L P S S M D S T L P G I S R Q V L S V S M E L K Y  
c c c c c c c c c c c c c c c c c c c t t c c c c e e e c c c c h h h  
91 CAGTGTCAAAAGTGCAAGGACGTTCTGAGGAAACCTTTCCAGGCGCAGTGTGGACATCGTTTCTGCGTGTCTGTTTAAACAACCTACC  
31 Q C Q K C K D V L R K P F Q A Q C G H R F C V F C F K Q L T  
h h h h h h h h h h c c c c c c c c c c c c c c h h h h h h h h  
181 AGCTCTGGCCCAATTCCTTGGAAGCTTGTCGATGAAGGGATCTTTGAAGAAGAGCTCTCAATGCTCAACTTTTCTGTCGCTTTTCCA  
61 S S G P I P C E A C R D E G I F E E E L S M L N F S V A F P  
c c c c c c c c c c c c c c c c c c c c c c c c h h h e e h h c c c c c  
271 GACAATGCAGCAGCAAGAGAAATCGACAGTTTGCTGCTCAAAATGCCAATACGGCTGTTCCTGGGCAGGAACCTCTGAAGATTACGAG  
91 D N A A R R E I D S L P A K C P N D G C S W A G T L K D Y E  
t h h h h h h h h h h h h e c c c c c c t t c c c c h h h h h h  
361 GGTCAAGCAGGAGGCGGATGTGAATTCGAGCGTGTCAGTGTGACGCGTGTCAAGTCATCATCTTCTCAGTGAGCGAGAGCGGCACAA  
121 G Q H E G R C E F E R V K C D A C Q V I I L L S E R E R H N  
h h h h c c c c h e e e c c c c c c c c h h h h h h h h h h  
451 GAGAGAGGTGTGAAGCCCGTAACCTTAACGCAAACTGCAAAAGTTTCTTCAGCTTTAAAGATATCAAGGCTCATGATGAGATCTGT  
151 E R E C E A R N L N C K Y C K V S F S F K D I K A H D E I C  
h h c c c c c h h c c c c c c c c c c e h h h h h c c c c c c  
541 TTAAATTTCCCAATGCAATGCAAGATTGTGGTAAAGAAAGATCCCGCAGAGAAAAGTTTCAAGAGCATAGCAATCTCTGCGCAAGTCT  
181 L K F P M Q C K D C G K K K I P R E K F Q E H S K S C A K S  
c c c c c c c c c c c c c c c c c c c c c c h h h h h h h h h h  
631 AAGATGCGCTGTAGTACAGCGAGATAGGCTGCAGAGCTGTGGTGGACAACGGAAGCAGCAGGAGCATGAACAGAGCAGTGTGATCGAG  
211 K M A C Q Y S E I G C R A V V D N G K Q Q E H E Q S S V I E  
c c c c c c c c c c c c c c c c h h h h h h h h h h h h h h h h  
721 CACTTGGCGCTCATGTGCGCATGATCTGTCGGTGGCGCTCGACCCGAGCAGCGGAGAGTGGCAGGAGGACTCGGGTTTCGGCCTG  
241 H L R L M L A M I S S V R P R P E A A G E W Q E D S G F G L  
h h h h h h h h h h h h h h h h h c c c h h h h h h h h h h  
811 TACCGGGCCCTGAAGACACGGTTCTTCCAGGCTCCAGGGTGCATCGGGAGACTCCTGCATGCAGCGGAAGATGACGCGCTGGAGAAC  
271 Y R G P E D T V L P G S Q G A S G D S C M Q R K M T A L E N  
h h h h h h h h h h h h h h h h h h h h h h h h h h h h h  
901 ATCTGTGCGTGTGAACAGAGGTTGGAGCGCAGAGCTCTCAGGCTCGAAGCTCTTGAAGACAGCAGCGATCGACCGAGGAGATC  
301 I V C V L N R E V E R T A L T L E A L G R Q H R L Q E K I  
h h h h h h h h h h h h h h h h h h h h h h h h h h h h h  
991 GAGAACCTATCCAACAGGTGCGTCAGTTGGAGCGGACGTTAACGATGCGAGATCTGCAACTCGCGAATCGGAACAGAAATTTGCGAGAG  
331 E N L S N K V R Q L E R T L T M R D L Q L A E S E Q N L R E  
h h h h h h h h h h h h h h h h h h h h h h h h h h h h h  
1081 CTGCAGTTTTGTACGTTTCGATGGCGTGTTCATTGGAAAAATCTCCGATTTACCCGTCGCAGACAAGATGCTCTGGCTGGACGAGCGCT  
361 L Q F C T F D G V F I W K I S D F T R R R Q D A L A G R A P  
h h h h c c t t t e e e e e e h h h h h h h h h h h h h t t c c c  
1171 GCCATGTTCTCGCCAGCATTCTACTCCAGTAAGTATGGCTATAAGATGTGTTTGAGGCTGTACCTGAACGGAGACGGTTCCGGGAAGAAAC  
391 A M F S P A F Y S S K Y G Y K M C L R L Y L N G D G S G R N  
e e c c c c c c c c c c c t t c e e e e e e e e e t t c c c c c c  
1261 ACTCATCTCTCGCTGTTCTTTGTGGTATGAGAGGGAATACGACGCTCTACTCAATGGCCCTTCAGCCAGAGGTAACCTCTGATGCTT  
421 T H L S L F F V V M R G K Y D A L L K W P F S Q K V T L M L  
c c e e e e e e e e e t c c c h h e e c c c c c c c c e e e e e  
1351 CTAGACCAGAATAACCGGAACACATCATCGATGCTTTACAGCTGACATCAGCTCCAGTCTTCCAACGCCATCATGAGATGAAC  
451 L D Q N N R E H I I D A F R P D I S S T S F Q R P I S E M N  
e c t t c c c h e e e e c c c c c c c c c c c c c c c c c c c  
1441 ATAGCCAGCGGCTGTCCACTCTTCTGTCCACTGGCCAAGCTGGCAGGAAAAAGTTCCATGTCCGTGATGACACGATCTTATTAAAGCG  
481 I A S G C P L F C P L A K L A G K S S Y V R D D T I F I K A  
c c c c c c e e e e h h h h c c c c c e e c t t c e e e e e  
1531 ATCGTAGATCTCACAGGACTTTAA  
511 I V D L T G L \*  
e e c t t t c



[illegible]



## E

1 **ATG**CCCGGCTACGACTATAAGTTCTGGAGAAGCCCAAGAGGCGCTTTCAGTGTCGCTGTGCAGTAAAGCCATGAGAGAACC GG TG CAG  
 1 M P G Y D Y K F L E K P K R R F Q **C P L C S K A M R E P V Q**  
 c t t c c e e e c c c c c c c h h c c c h e e e e c c c c c c e  
 91 GTGTCGACCTGCGGCCACAGATTCTGCGACCTGCGTG CAGGAGTTCTCAGTGAGGGGTATTCAAGTGCCCCGAGGACCAGCTCCCC  
 31 **V S T C G H R F C D T C L Q E F L S E G V F K C P E D** Q L P  
 e c c c c c c c c c c c h h h h h h h h h c c c c c c c c c c c c c c c  
 181 CTGGACTACGCTAAGATCTACCTGACCCGAGCTGGAGCAGCAGATCCTGGCTCTAGCTATCCGCTGCATCCACAGTGAGGAAGGCTGT  
 61 L D Y A K I Y P D P E L E Q Q I L A L A I R C I H S E E G C  
 c c h h h c c c c c c c h h h h h h h h e e e e c c c c c c c c c c  
 271 CGCTGGACCGGCCAGATGAAGCAGCTGCAGAGCCATTCTCTACCTGTGCATTCAATGTGATCCCGTGCCCTAACCGCTGCAGCGTCAAG  
 91 R W T G Q M K Q L Q S H F S T C A F N V I **P C P N R C S V K**  
 c h h h h h h h h h h h h h c c c c c e e e c c c c c c c c c h  
 361 CTGACACGCCGAGACCTGCCGAGCACCTGCAGCAGACTGCCCAAGCGCAAGGTCAAGTGGAGTTCTCGGCAGCGAGTTCACCGGC  
 121 L T R R D L P E H L Q H D C P K R K V K C E F C G S E F T G  
 h h h h h h h h h h h c c c c c e e c c c c c c c c c c h  
 451 GAGGCTTCGAGAAATCACCAGGGCATTGTGCCAGGAGAGTGTATTGTGAGAACAAGTGTGGAGCGAGGATGATGAGGAGACTCCTG  
 151 E A F E N H **Q G I C P Q E S V Y C E N K C G A R M M R R L L**  
 h h h h h c c c c c c c c c c e e c c c c c c c c c c c c c h h h h  
 541 GCCCAGCACACCATGTCTGAGTGTCCTCAACGACACAGCCATGCAAGTACTGCGGCAAGAGTTTGCTACGACCATCCAGAATCAT  
 181 A Q H T M S E C P K R T Q P C K Y C G K E F V Y D T I Q N H  
 h h h h h h c c c c c c c c c c c c c c c c c c c c h h h h h  
 631 CAGTACCACTGCCACGTTTCCAGTCCAGTGCCCAACCAAGTGTGGTGCCCCCAACATGCCCGTGAAGATCTCGCAACCCATGTAAAG  
 211 **Q Y H C P R F P V Q C P N Q C G A P N I A R E D L A T H V K**  
 h c c c c c c c c c c c c c c c c c c c c c c c c c h h h h h h h h  
 721 GAAAGCTGCGGAGTCTTAGTGCTCTGTCCTTTAAGAAAGCTGGATGCAAGCATCGATGCCCAAGCTGGTGATGGCCGACACCTG  
 241 E S C G S A L V L C P F K E A G C K H R C P K L V I G R H **L**  
 h h h h h h h h h h h h h h h h h c c c c c c h h h h h h h h  
 811 GAGGAAACCAAGTCCCACTTGACCATGATGTGCAACCTGGTAGGTGCTCAGCGGCAAGAGATCGCAGAGCTGCGGCGAGATCTGGAG  
 271 E E T T K S H L T M M C N L V G R Q R Q E I A E L R R D L E  
 h h h h h h h h h h h h h h h h h h h h h h h h h h h h h h  
 901 GAGCTGTAGTGAGCCATGATGGTGACTCATCTGGAAGTGAACGATTACTCAGCAAGTTGCAGGAGGCCAAATGCACAGCAACCAT  
 301 E L S V S H D G V L I **W K L N D Y S R K L Q E A K M H S N H**  
 h h h h h c c t t t c e e e e e h h h h h h h h h h h h h h h c c c c c  
 991 GAGTTCTTCACTCCACCTTTTACACACCCGCTATGGCTATAAGCTGCAGGCATCCGCTTTCCTCAACGGCAACGGGAGCGGCGAAGGC  
 331 **E F F S P P F Y T H R Y G Y K L Q A S A F L** **N** G N G S G E G  
 e e e c c c c c c c c c c c c c c e e e e e e e e e e t t c c c c c c  
 1081 TCACATCTCTCCGTCTACATCCGTGTGCTGCTGGCGAATACGACAACCTTCTCGAGTGGCCCTTTTCTACAAGGTCACTTTCTCCATT  
 361 **S H L S V Y I R V L P G E Y D N L L E W P F S Y K V T F S I**  
 c e e e e e e e e e c t t t c c h h h e c c c c c c c e e e e e e  
 1171 ATGGACCAGAGTGATCCATCACTCTCCAAACACAGCACATCACTGAGACGTTCAACCCGAGCCCAACTGGAAGAACTTCCAGAAAACCC  
 391 **M D Q S D P S L S K P Q H I T E T F N P D P N W K N F Q K P**  
 e c c c c c c c c c c c h h h h e e e c c c c c c c c c c c c c c c  
 1261 AGTGGCAGCCGAGCTCACTGGACGAGAGCGCACTAGGCTTTGGCTACCCCAAGTTCTCTCGCAGGAGGATCCGCAAGAGGAACCTAC  
 421 **S G S R S S L D E S A L G F G Y P K F V S H E E I** R K R N Y  
 c c c c c c c c c c c c c c c c c c e e e e h h h h c c c c c  
 1351 ATCCGTGACAATGCTATCTTCTGAAGGCTCTATTGAGATCCCAAAAAGATCATGGCT**TGA**  
 451 I R D N A I F L K A S I E I P Q K I M A \*  
 c c t t c e e e e e e e c c c c h e e h

F

1 **ATG**CCTGGTTTAGATTACAAGTTTCTGGAGCGACCGAGACGCCGCTTCTGTGTCCTTTGTGCAGTAAACCGATGAGGGAACCTGTCCAG  
1 M P G L D Y K F L E R P R R R F L C P L C S K P M R E P V Q  
c t t t c c h h h h c c c c h h h c c c c c c c c c c c c c c e e  
91 GTGTCCACCTGCGGACACAGGTTCTGTGACACCTGTCTGCAGGAGTTTCTCAGTGCCGGCATATTCAAGTGCCAGAAAGATCAGATGCT  
31 V S T C G H R F C D T C L Q E F L S A G I F K C P E D Q M P  
e e c c c c c c c c c h h h h h h h h h t c c c c c c c c c c c c c  
181 CTCGACTACGCTAAAAATTTCCAGATGTCGAGTTGGAGCAGCAGATTCTGGCTCTGCCATCCGCTGCATTACAGTGAGGAAGGTTGC  
61 L D Y A K I F P D V E L E Q Q I L A L P I R C I H S E E G C  
c c h h h e c c c h h h h h h h h h h e e e e c c c c t t c c  
271 CGCTGGTCAGGACAGAATAAACAACACTACAGGTCCATCTCTCAGTATGTACCTATAACGTGGTCCGTGTCCAAACCGCTGCATGATGAAA  
91 R W S G Q N K Q L Q V H L S V C T Y N V V P C P N R C M M K  
c h h h h h h h h h h h h h h t c c c e e e c c c c c c c c h h  
361 CTGTTGCGCCGTGATCTTCTCAGCACCTGCAGCATGACTGCACCAAGAGAAAGTCGCTGTGACCACTGCGTGTGATGAGTTACAGGG  
121 L L R R D L P Q H L Q H D C T K R K L R C D H C A D E F T G  
h h h h h h h h h h h c c c c c c c c c e e c c c c c c c c c h  
451 GAAGCAGATGAGAGACACAGGACATGTATCCAGAGGAGAGTGTGTACTGTGAGAATAAGTGTGGGGCTCGTATGGTGGCAGGTGCTG  
151 E A H E R H Q D M Y P E E S V Y C E N K C G A R M V R R L L  
h h h h h c c c c c c c h h h h h h h h h h h h h h h h  
541 ACGCAGCACAGCGTGTCGAAATGTCCTAAACGCAAAGTCTCTGCAAATACTGCAGCAAGGAGTTCCTGTACGACACCATTGAGAAATCAT  
181 T Q H S V S E C P K R K L S C K Y C S K E F L Y D T I Q N H  
h h h h h h h h h c c c c c c c c c c c c c c c c c c h h h h h h h h  
631 CAGAGCCAGTGTCCACGCGTCCAGTGCAGTGTCTTAACAGCTGTGGCACACCCGGCATCCCGAGAGGATTTAACCATTTCATGTTAAG  
211 Q S Q C P R V P V Q C P N S C G T P G I T R E D L T I H V K  
c c c c c c c c c c c c c c c c c c c c c c c c h h h h h h h h h  
721 GAGAGCTGTGGGACCTCCATGGTCTGTCTTAAAGACGCGGCTGCAGATACAGATGCTCAAGCCTGCAGTGTCCCTTCACCTG  
241 E S C G T S M V L C P F K D A G C R Y R C S K P A V S L H L  
t t c c c c c e e e c c c c c c t t c c c c c c c c h h h h h h h  
811 GATAGCCCGCTCACTCTACCTGTCTTACTCAGCAGCCTGTTTCTAGGCAGAGACTCGAGCTGCAAAAGCTGAGGCGTCGTTGTCGAG  
271 D E A A H S H L S L L S S L V S R Q R L E L Q K L R R R V E  
h h h h h h h h h h h h h h h h h h h h h h h h h h h h h  
901 GAACCTTCCGGAACCAAGACGGGACTTTACTTTGGAAAAATCCCAACTACAGCCGTCACCTACAAGAAACAGAAATGCTCGAATGGA  
301 E L S G T Q D G T L L W K I P N Y S R H L Q E T R N C S N G  
h h h h c c c c c c e e e e h h h h h h h h h h h h h c c c c c  
991 ACGTCGGAGCTCTTCAGCCCCGTTTCTACTCTCATCGCTACGGATACCGTCTCCAAGTTCGGTCTTTCCGAACGGGAACGGCAGCGGC  
331 T S E L F S P V F Y S H R Y G Y R L Q V S V F P N G N G S G  
c c e e e c c c c c c c c c c c c c c c e e e e e e e e c c c c c c  
1081 GAAGGAACATACCTCTCCGTCTATATCAGAGTGTCCCGGGGAGTACGACGGCCTATTGGAGTGGCCGTTCCCTCACCAGCTCACCTTC  
361 E G T Y L S V Y I R V L P G E Y D G L L E W P F P H R V T F  
c c c e e e e e e e h c t t t c c c h h e c c c c c c c e e e  
1171 TCGTGTGTGACCAGAGCGACCCAGTACTGTCCAAACCTCAACAGCTACCGGGAGCTTCAGCCAGATCCCAACTGGAAGAACTTCCAG  
391 S L L D Q S D P V L S K P Q H V T G S F S P D P N W K N F Q  
e e e c c c c c c c c c c c c c h e e e e c c c c c c c c c c c  
1261 AGACCTCGACCTGGAGCAATCGGGAGCGTACGTACCAGCCTTTTGGACGAGAGTATGCTGGGATTGCGGTACCCCAAGTTTATCTCGCAC  
421 R P R P G A I G S V R T S L L D E S M L G F G Y P K F I S H  
c c c c c c c c c c c c c c c c c c c c c c c c c c c e e e c h  
1351 GAGCAGATGAAGCAAAGGAACATACATCAGAGACAACGCCATCTTCATCAAAGCTTCTGTAGATGTGGTGACAGAGAATAATCAACTAA  
451 E Q M K Q R N Y I R D N A I F I K A S V D V V Q R I I N \*  
h h h h h c c c c c t t c e e e e e e e c c c h h e e c



## G

1 **ATG**GCAGCTGAGGAGAATGAATGCTTGAGCCTCCAGCTCTCAAAACAGAGCTCTGATCCTGTGAGGTCGTGGGAGTTGGAGTCTGTCCTG  
1 M A A E E N E C L S L Q L S K Q S S D P V R S W E L E S V L  
h h h h h c c c c h e e e c c c c c c c c c h h h h h h h h  
91 GCCAATCGCACACTCAGTTTGTGTCGGGCTTGAGGAGCGCTACATGTGCCCGGCTGTGGTGACGCCATTCTTAACCCCCACCAGAGC  
31 A **(N)** R T L S F V S R L E E R Y M C P A C G D A I L N P H Q T  
h h h h h h h h h h h h h h h c c c c c c c e e e e c c c c c  
181 GGCTGTGGCCACATCTTCTGTGCCAAGTGCATTAGAACGTTTATTGAGAGCCGCGACACATCCAAATGTCCCTTAGATGGCATTITTTGATC  
61 G C G H I F C A K C I R T F I E S R D T S K C P L D G I L I  
c c c c c e e c h h h h h h h h h c c c c c c c c c c c c c h e  
271 AAGTCTGAGGAGGTTTTCAAGACAAGTGTGTAAGAGAACTACTAAATCTTGAAGTTTACTGTAGCAACACTCCAGATTGCACACAA  
91 K S E E V F Q D N C C K R E L L N L E V Y C S N T P D C T Q  
c h h h h h c c c c c c c h h h h h e e e e e e c c c c c c c c c  
361 AAAGTGCTCTGTGTAATTTGAGAAACACCTAAGTCTTTGTCAGTATGAGACCTGCAATGCTCAACCCCGGCTGCACTGACATCCTG  
121 K V P L C N L Q K H L T L C Q Y E T L Q C S N P G C T D I L  
h e e h h h h h h h h h c c c c c h h e e c c c c c t t c c h h h  
451 TTACGCAAGAAATGACCAGACCAGCGAAACCTGTGTCAGTTTCGACAGAGTTCTGTACTATTGCACAAGCCATACCTATTACC  
151 L R K N V P D H Q R N L C Q F R T E F C H Y C T K P Y P I T  
h h h h h h h h h h h h h c c c c c c c c c c c c c c c c h h  
541 CAGTCCAGGACCATGAACAGATGTCATGCCCTGAAGCAGAGCTTCAGTGTCCCAATAACTGCTCTCAGATGGTTAAGAGGCATAAGCTC  
181 Q L Q D H E Q M S C P E A D V Q C P N N C S Q M V K R H K L  
h h h h h h h h h c c c c c c c c c c c c c c c c c h h h  
631 AAAGGACATATAGATGAGTCCAGAAGTGGAGACAGACTGTATTATAAGCAATATGGCTGCACAGTCCGAGATAAACGAAGCAAAGTG  
211 K G H I D E C P E V E T D C I Y K Q Y G C T V R D K R S K V  
h h h h h c c c c c c c c c c c c c c c e t c c c c e e c c c h h h  
721 AAAGTCCATGAATACACTGAATTTAGCCATCATGTGCTACTTGTACTGGAGAGCAACAGCAAGCTTGTAAACAGGTAGACCAGCTGCAG  
241 K V H E Y T E F S H H V L L V L E S N S K L A K Q V D Q L Q  
h h h h h h h h h h h h h h h h h h h h h h h h h h h h h  
811 CAGGACTTGGCCCTCCAGGAGAGGGAGCTGAAAGAGAGAAACTTGTCTTGTGTAACCTTAACAGGAGATGACCAAGTGTGACAGCGCA  
271 Q D L A L Q E R E L K E R N L L V A N L N R E M T K C D S A  
h h h h h h h h h h h h h h h h h h h h h h h h h h h h h  
901 TTTCTGCAATTGAGAGGTCAGTGGTGGAGCAGAGGCGCTCTCAAGCGTTAAACAGGAGCTGCAGGAGTTGCGTAATGTTCTGGAT  
301 S S A I Q R S V V E Q R E S V S S V K Q E L Q E L R N L D  
h h h h h h h h h h h h h h h h h h h h h h h h h h h h h  
991 GCTGAGCTGGCTAAAGAGGAGCTGAGTGATCTCCGAGCTTCACTGCACTCTCTCAGACAGCAAGTGGCAATGACACAGAGCCTCAGAGAT  
331 A E L A K E E L S D L R A S L D S L R Q Q V A M T Q S L R D  
h h h h h h h h h h h h h h h h h h h h h h h h h h h h h  
1081 CACCTGGGAGCTTTAGGTCAGACATGTCAGCGTCACACTCGACTACTGGACATCCATGTGGAGCAGCTGCAGTGAACGAGCAACGTTTT  
361 H L G A L G Q T C Q R H T R L L D I H V E Q L Q C N E Q R F  
h h h h h h h h h h h h h h h h h h h h h h h h h h h h h  
1171 CGCCAAGTGTGACGTCATATGATGAAAACTCATCTGGAAGATTCTGGACTACCAGCGTAGAAAAAGCGTGGTGACCCGCTCACC  
391 R Q L E S T S Y D G K L I W K I L D Y Q R R K D A G A P L T  
h h h h h h h c c t t t c e e e e e h h h h h c c c h h c c c c  
1261 TCACCGCCTTTTACACCGGCCGAGTGGCTACAAGCTGAGTGGCCGTGCGTACCCGGATGGGGACGGAAGCGCCGAGGCACACCTT  
421 S P P F Y T G R S G Y K L S A R A Y P D G D G S A R G T H L  
c c c c c c c c c c c c c e e e e e e e e t t t t c c c c c c c e  
1351 TCTCTACATCATGGTGATGAGAGGTGACTTCGACTCACTGCTGCCGTGGCCATTTCGCCAGAGCGTCACACTCACCGTGTAGACCAG  
451 S L Y I M V M R G D F D S L L P W P F R Q S V T L T V L D Q  
e e e e e e e t t t t t c h e e c c c c c c t t e e e e e e c t  
1441 AGTGGCTCAGCAACACGTCAGCTGCAGCTTACCCCTGACACCAGCAAAGAGAGCTTCGCCAGACCCACAGCTGACAGCAACGCGCGG  
481 S G S R N H V S C S F T P D T S K E S F R R P T A D S N A A  
t c c c c c e e e e c c c c c c c c c c c c c c c c c c c  
1531 TTAGGGTTCTCTCGCTTCTCTCAGACTGACCTGGAAGGTCCCGAAAAGCCATCTTCATACGAGATGACACTCTGTTTGCAAGGTT  
511 L G F S R F I S H T D L E G P R N A I F I R D D T L F V K V  
t t c c e e e e e h c c c c c c c t t c e e e c t t c e e e e e  
1621 AAGGTTGACACAAACAGGGTTGGAGGATTG**TAG**  
541 K V D T T G L E D L \*  
e e c c c c c c t h



## H

1 ATGGCATCATGATAGTACATGCACAAATCCAATCCAGATGAGTATCCATCATCCAGATGATGGCTGATATGGAGAAGGAGTCGTATCTA  
1 M A S C S D M H K S N P D E Y P S S R C M A D M E K E S Y L  
c c c c c h h c c c c c c c c c h h h h h h h h t t c c e e  
91 AGCCCTACAGATAGCCCATCTACAATTAGTGTCTCATCCAACATCCAGGAACAGCAAGGCTATGATGTTGAATTTGATCCCCACTGGAG  
31 S P T D S P S T I S V S S N I Q E Q Q G Y D V E F D P P L E  
c c c c c c c e e e c c c c c c c c c c c c c c c c c c c c  
181 AGCAAGTATGAATGTCCCATCTGCCTGATGGGTCTACGGTCAAGTGTGCAGACACCATGTGGTCATCGCTTCTGTAACAGTTGTATTAAA  
61 S K Y E [C P I C L M G L R S A V Q T P C G H R F C N S C I K]  
c c c c c c c e e e e e e e c c c c c c c c c c c c c c c c h h h h h  
271 AAATCCATCAGGGACAGGGGCAAAAATGTCCAGTTGACAATGAGGTGCTGACAGAGGACCAGCTTTTCCAGATAACTTTGCCAAGAGG  
91 [K S I R D T G Q K C P V D] N E V L T E D Q L F P D N F A K R  
h h h c c c c c c c c c c c c c c c c c c c c c c c c c c c c h h h h h  
361 GAAATCCTGTCTCTTACTGTACGCTGCCGAATGTTAGCTGTAGTGACATAATGGAGCTCAGGCACCTGGAGAATCACTTGAAGCTATGT  
121 E I L S L T V R C R [N] V S C S D I M E L R H L E N [H L K L C  
h h h e e e e e c c c c c c c c c c h h h h h h h h h h h c c c  
451 AAATTTGCTACAGTGCCTTGTCCCCAGTGTAGAGGCTGTATGGAAGAATAGTATAGAGGACCATATGAATCAGGACTGTTTACAGGCT  
151 K F A T V P C P Q C Q R P V W K N S I E D H M N Q C D C L Q R  
c e e e e c c c c c c c c c c h h h h h h h h h h h h h h h c c c c  
541 CTGATCATATGCCCTGACTGTGCAGAGGGTATCATCTATGCTGACAAACAGTTTCATGAGCAGATGTGCCCTTGTGAATACAGTGTGT  
181 L I T C P D C A E G I I Y A D] K Q F [H E Q M C P F V N T V C  
c c c c c c c c c c c c c c h h h h h h h h c c c c c c c c c c  
631 GAGTACTGTGGAATGATTAAATTCGGGGTCAGTTGTCTACACTGTGCCACAGACTGCCTGAAAGCTCCTGTTCCTGTACGTTCACAC  
211 E Y C G M D L I R G Q L S S H C A T D C L K A P V A C T F N  
c c c c c c c c c c h h h h h h h c c c c c c c c c c c c c c c c  
721 ATATTTGGCTGTCAAGAAAAGATGCCGAGGAACAACCTGGCCCTTCACATGCAGGAGTTTACACGGATGCACATGCGTTTCATGGCTGAC  
241 I F G C Q E K M P R N N L A L H] M Q E F T R M H M R F M A D  
c c c c c h h h c c h h h h h h h h h h h h h h h h h h h h  
811 TTCCTGAGGAATCAGAGTGTGAATGGCATTCTCCCGCTCCAAAATGTGGCCCTTCATGTTACCCCCATCCGAACATGGTCCAGTTCC  
271 F L R N Q S V N G I L P A P K C G P S C S P P S E H G A S S  
h h h h h h h h h h h c c c c c c c c c c c c c c c c c h h c c c  
901 AGGGTGGGAGCCATGTAGTGCAGCCAGGACATGCAGCAGTTACGTGAGACTGTTGTGGAACITGAGGGCCGCTCGTGCGCAGGAC  
301 R V G E P C Q C S Q D M Q Q L R E T V V E L E G R L V R Q D  
c c c c h h h h h h h h h h h h h h h h h h h h h h h h h h h h  
991 CACCAGTTACGGGAGCTGAGCATTGCAATGATACACAGCATAACAGATAACGGAGCTACGCAAGAAGCTGGCATCGCTGGAAGAGAAA  
331 H Q L R E L S I R N D T Q H T Q I T E L R K K L A S L E E K  
h h h h h h h h h h h h h h h h h h h h h h h h h h h h h h  
1081 ATGCACGAGCTGGAAGCTCAGCAGTACCAGGGTGTTTATGTATGGCGATTAGAGGGATTCTCAGCTCACCTGCAACAACAGAGCAGGA  
361 M H E L E A Q Q Y Q G V Y V W R L E G F S A H L Q Q Q E A G  
h h h h h h h c c t t t e e e e e e h h h h h h h h h h h h t t  
1171 CAACCAGTAGTGTCCATAGCCACCATTTACACAGGAAAGCCAGGGTATAAGCTGTGCCTGCGACTGCACCTTCAGACACCCAGCGCG  
391 Q P V V L H S P P F Y T G K P G Y K L C L R L H L Q T P S A  
c c e e e c c c c c c c c c c t t c e e e e e e e e e c c c c c  
1261 CCACGTTGCTCTAACTATATCTCATTGTTTGTGCATACTATGCAAGGAGAAATTTGACAGCCAGCTACCGTGGCCCTTCAGGGCAACATC  
421 P R C S N Y I S L F V H T M Q G E F D S Q L P W P L Q G N I  
c c c c c h e e e e e e e h t t c c c c e e c c c c c c c c e  
1351 CGATTGTCTGTGCTGACAGGCTGAGGGCCAACACCACTGAGATAATGGAACCAACACAGACCTTCAGGCCTTCCAAAGGCCCACT  
451 R L S V L D Q A E G Q H H T E I M E T K P D L Q A F Q R P T  
e e e e e c c c c c h h h h h h h c c c c c c c c c c c c c  
1441 ATGCAGCGCAACCCAAAGGCTTCGGCTATGTCACATTATGTCAGTTGAGGCAATTGCGCCAGCGTGGTTTGTAGGGGTGATGTGCTG  
481 M Q R N P K G F G Y V T F M Q L Q A L R Q R G F V R G D V L  
c c c c c c c c e e e e h h h h h c c c c c c c t t c e  
1531 CTAGTGCCTGTGAGGTCATGCCTCGCTTTGACACAAGCCTTAGAAGAGAGGGCATGCAACCTCGAGAACCTGAACCATCTCTCTGA  
511 L V R C E V M P R F D T S L R R E G M Q P R E P E P S L \*  
e e e e e c c c c c c h h h c t t t c c c c c c c c c c



1

[illegible]

**Supplementary Figure S2. Comparison of the gene organization of TRAFs genes in fish and tetrapods.** Exon-intron structure of TRAFs from seven different vertebrate species: *Homo sapiens*, *Gallus gallus*, *Xenopus tropicalis*, *Oncorhynchus mykiss*, *Danio rerio*, *Ictalurus punctatus* and *P. fulvidraco*. The black boxes represent untranslated region, the white boxes represent exons, and the lines represent introns. The GenBank accession numbers of the TRAF nucleotide sequences are listed in Supplementary Table S3.

## A:TRAF1

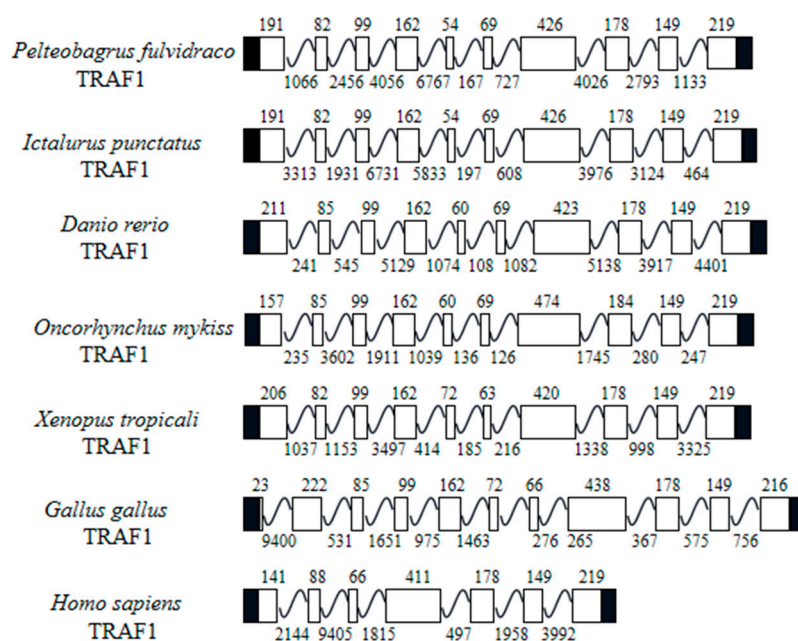

## B:TRAF2a & TRAF2b

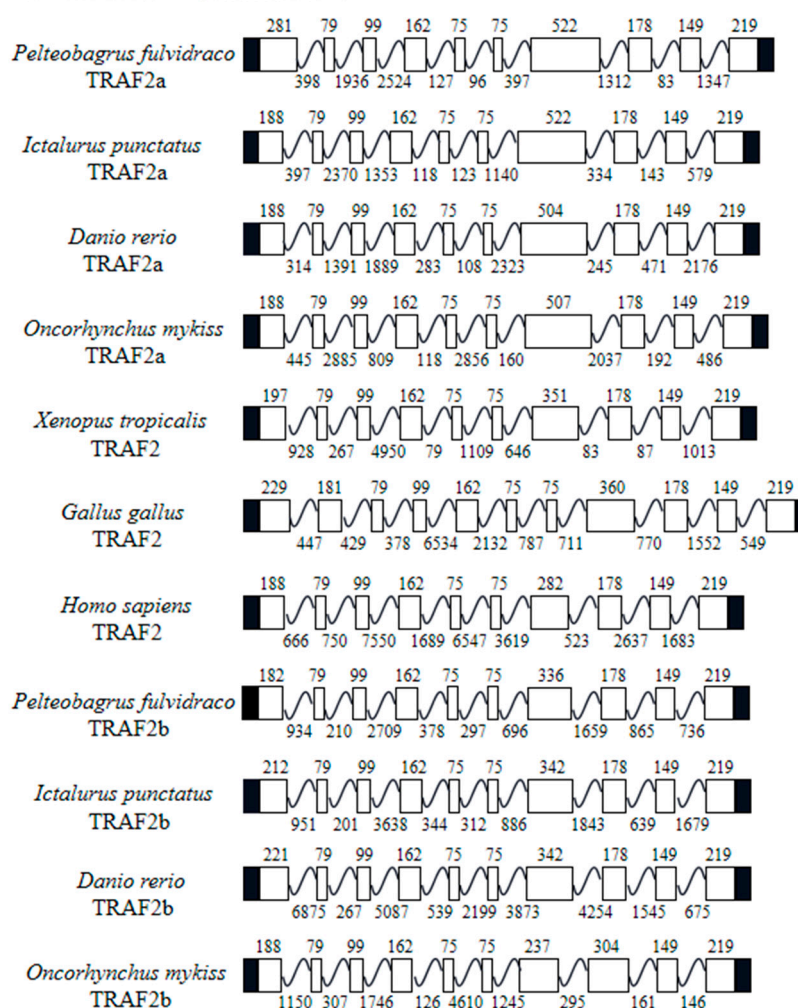



## C:TRAF3

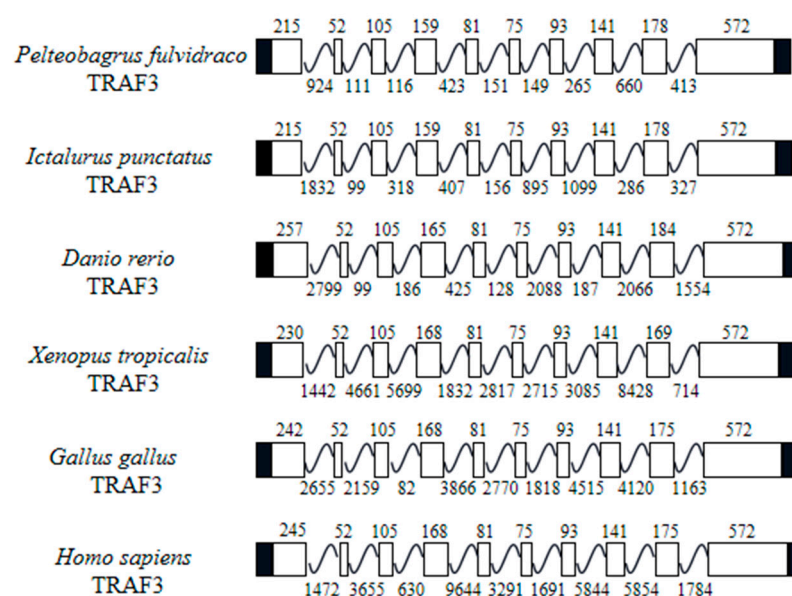

## D:TRAF4a & TRAF4b

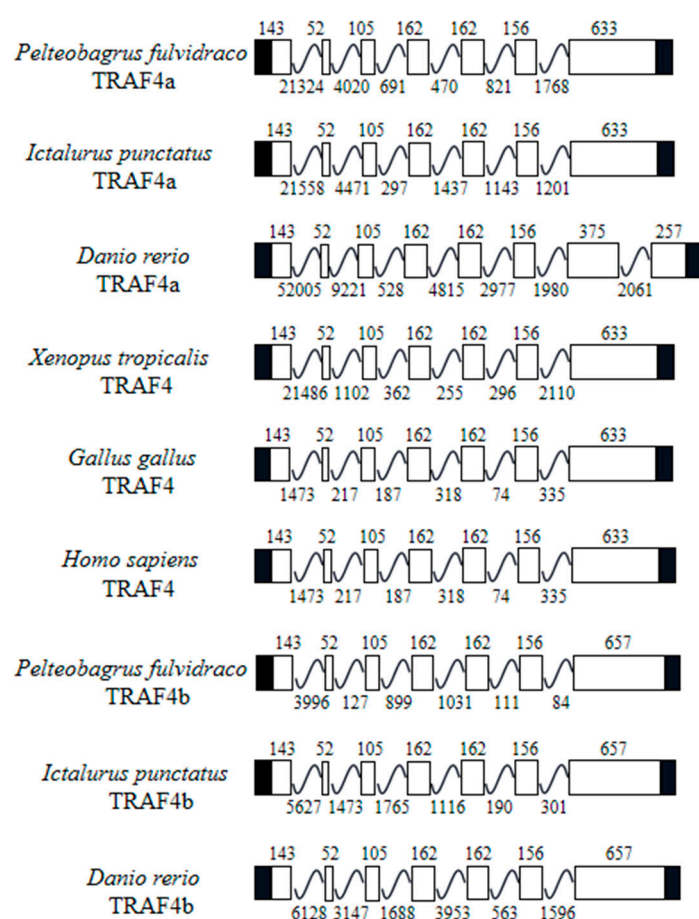

## E:TRAF5

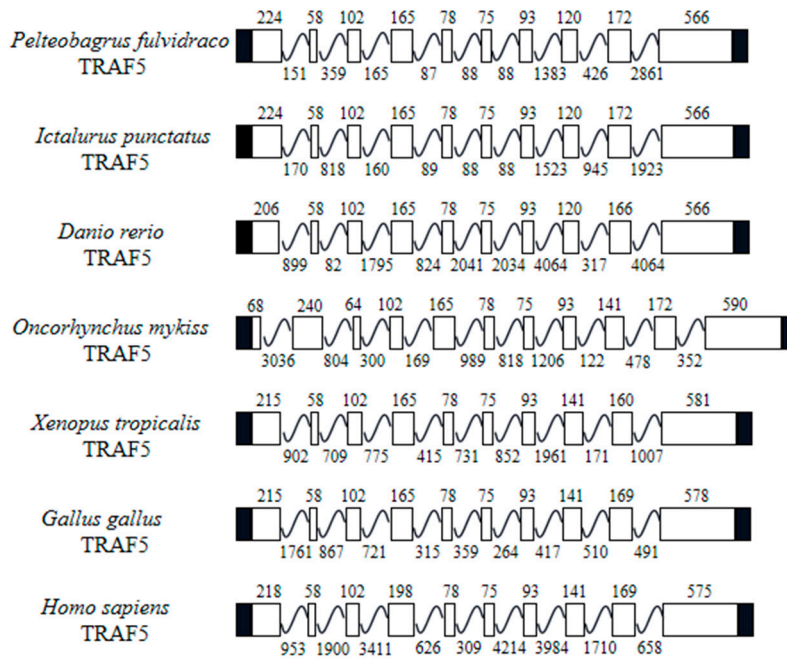

## F:TRAF6

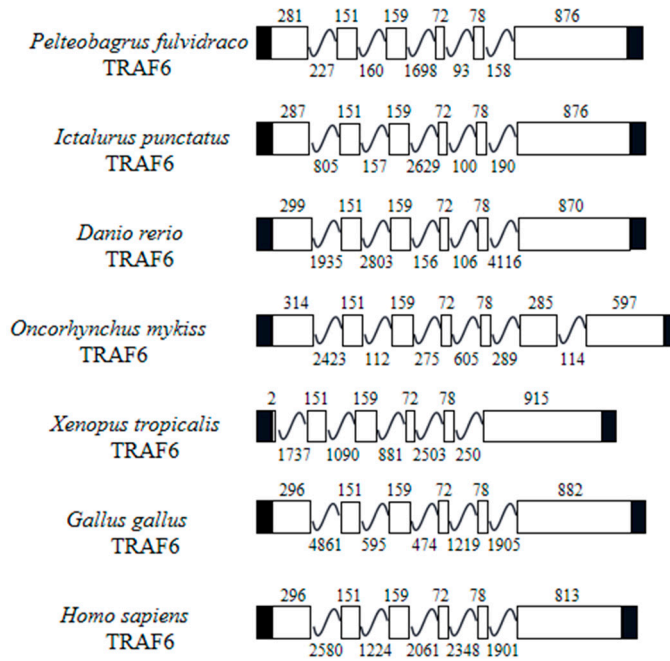

## G:TRAF7

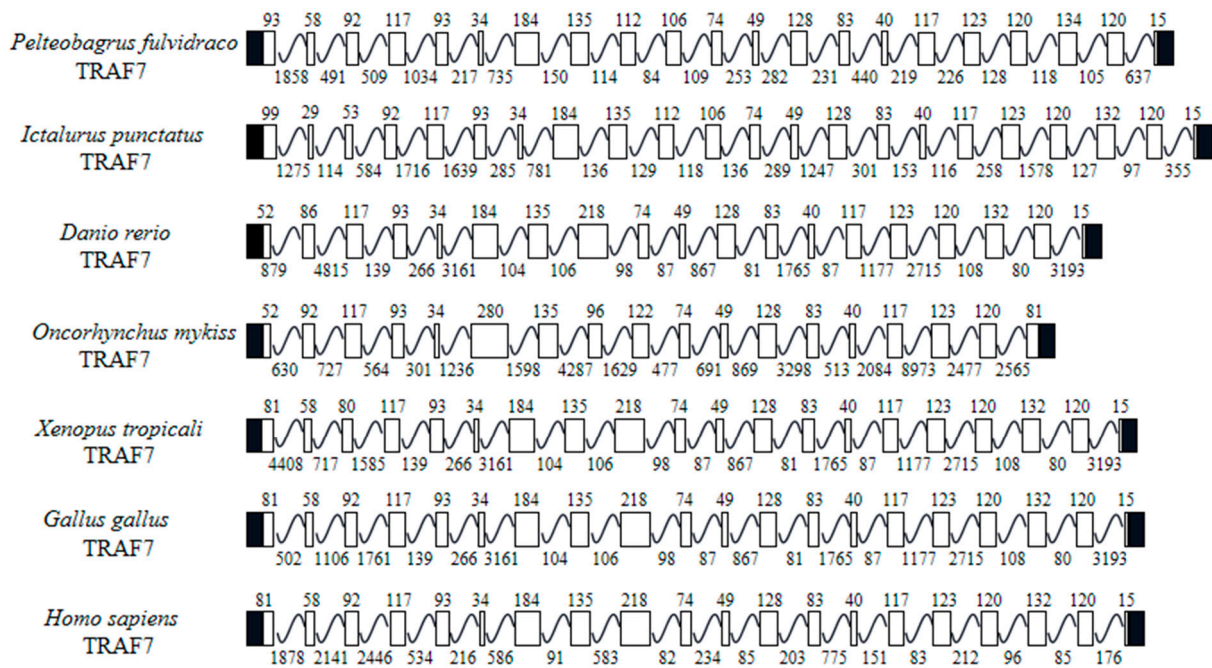

Supplement: s1 [file s1]
